# Supplementary material for: Enrichment and characterisation of ethanol chain elongating communities from natural and engineered environments
Source: PubMed Central journal article supplement (PMC7048776; doi:10.1038/s41598-020-60052-z), 2020-02-28
Supplement: 41598_2020_60052_MOESM1_ESM.pdf [file 41598_2020_60052_MOESM1_ESM.pdf]

1 Supplementary material to: Enrichment and characterisation of ethanol chain elongating  
2 communities from natural and engineered environments

3

4

5 **Pieter Candry<sup>1</sup>, Shengle Huang<sup>1</sup>, José Maria Carvajal-Arroyo<sup>1</sup>, Korneel Rabaey<sup>1</sup>, Ramon**  
6 **Ganigué<sup>1,\*</sup>**

7

8 <sup>1</sup> Center for Microbial Ecology and Technology (CMET), Faculty of Bioscience Engineering,  
9 Ghent University, Coupure Links 653, 9000 Gent, Belgium

10

11

12

13

14

15

16

17

18

19 \* Correspondence to: Ramon Ganigué, Ghent University; Faculty of Bioscience Engineering;  
20 Center for Microbial Ecology and Technology (CMET); Coupure Links 653; B-9000 Gent,  
21 Belgium; phone: +32 (0)9 264 59 76; fax: +32 (0)9 264 62 48; E-mail:  
22 [Ramon.Ganigue@UGent.be](mailto:Ramon.Ganigue@UGent.be); Webpage: [www.cmet.UGent.be](http://www.cmet.UGent.be).

23 **S.1. Net growth of enrichments over different transfers**

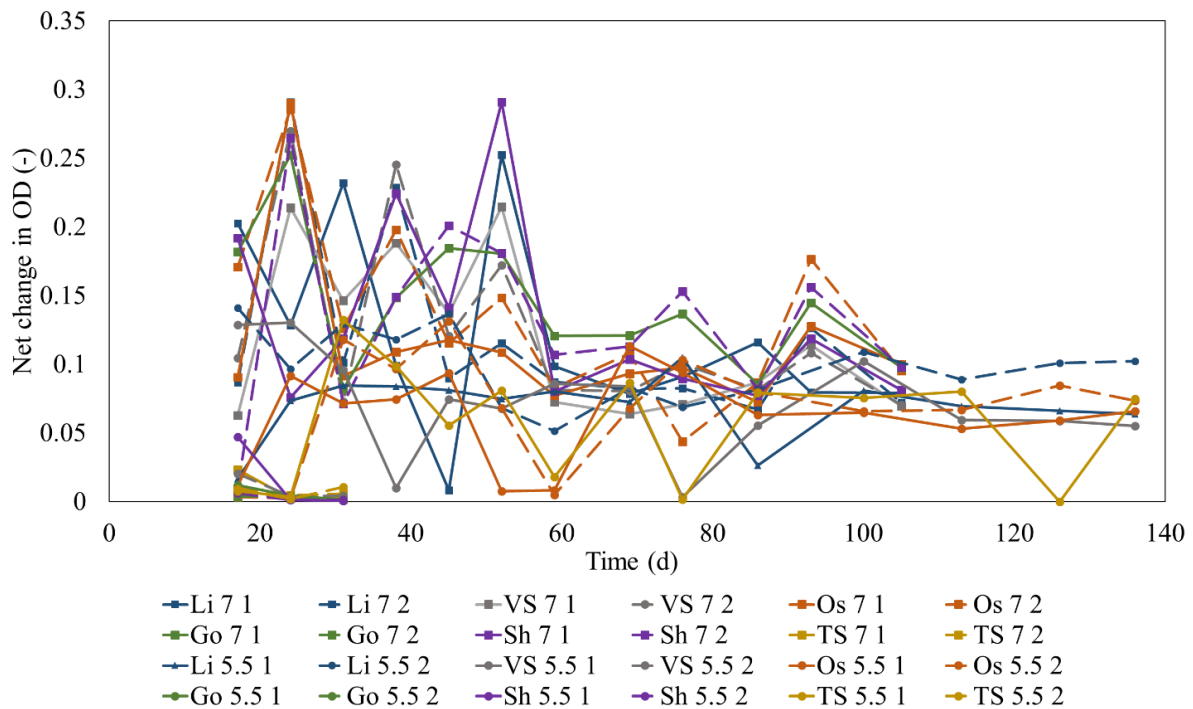

25 **Figure S.1.** Net increase of OD at the end of each transfer over time. Colours indicate original  
 26 inoculum: blue comes from Lindemans brewery full-scale UASB, gray from Van Steenberghe  
 27 brewery full-scale UASB, orange from Ossemeersen full-scale CSTR AD, green from goat  
 28 faeces, purple from sheep faeces and golden from thin-stillage lab-scale pilot. Shape of symbols  
 29 indicates pH of enrichment: squares were enriched at pH 7, circles at pH 5.5. Lines indicate  
 30 enrichment replicate: full line was replicate 1, dashed line replicate 2. After the third transfer  
 31 (day 31), all enrichments with an OD below 0.01 were dropped. Sample names were  
 32 constructed of inoculum origin, enrichment pH and replicate number, e.g. Li 7 1 represents  
 33 replicate 1 of Lindemans inoculum enriched at pH 7.

34 **S.2. Aggregated growth in enrichment series TS 5.5 1 during growth curves**

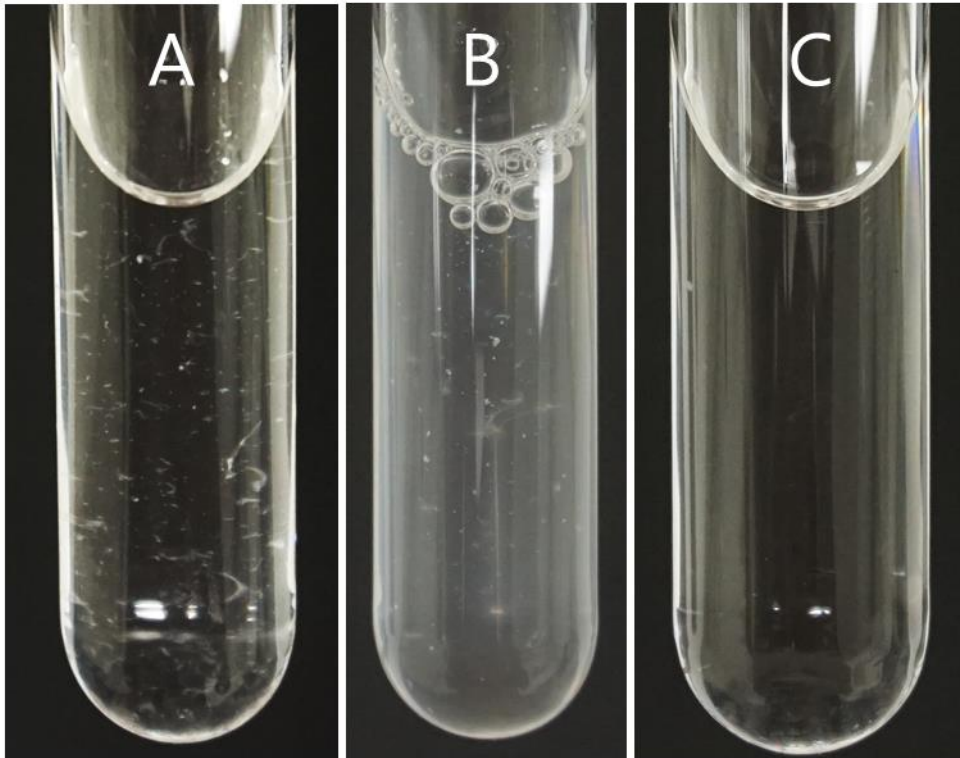

35

36 **Figure S.2.** Pictures of growth in Balch tubes after 7 days of incubation for growth curve  
37 experiment. Panel A shows aggregated growth in enrichment TS 5.5 1 (replicate A), Panel B  
38 shows suspended growth in Li 5.5 1 (replicate C), and Panel C shows an uninoculated control  
39 after 7 days of incubation at 34°C.

40 **S.3. Community composition after enrichments**

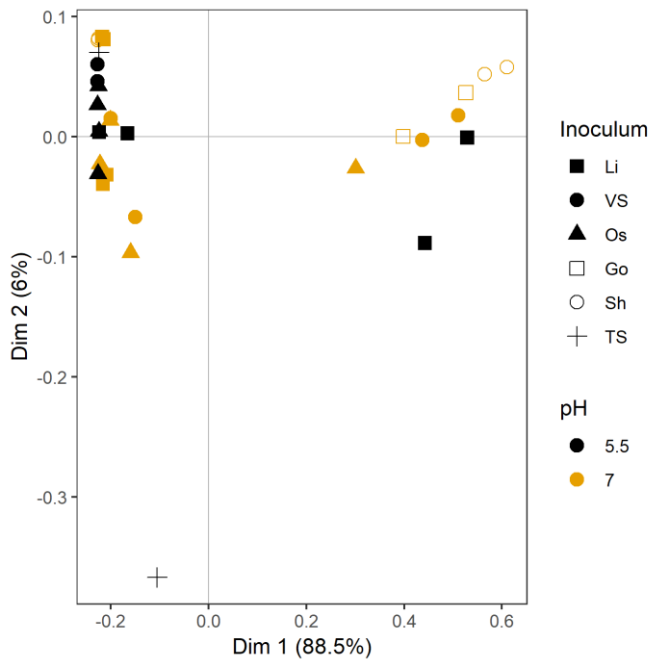

41

42 **Figure S.3.** Beta-diversity analysis of high-throughput amplicon sequencing data (Illumina) of  
 43 enriched communities after 12 transfers. pH and inoculum are indicated by color and shape of  
 44 the points respectively. Black symbols represent communities enriched at pH 5.5, gold points  
 45 those enriched at pH 7. Symbol shapes refer to the initial inoculum the community was  
 46 enriched from; full square for Lindemans brewery full-scale UASB (Li, ■), full circle for Van  
 47 Steenberghe brewery full-scale UASB (VS, ●) full triangle for Ossemeersen full-scale waste  
 48 activated sludge digester (Os, ▲), empty square for goat feces (Go, □), empty circle for sheep  
 49 feces (Sh, ○), and plus sign for + semi-pilot-scale thin stillage fermenter producing caproic  
 50 acid.

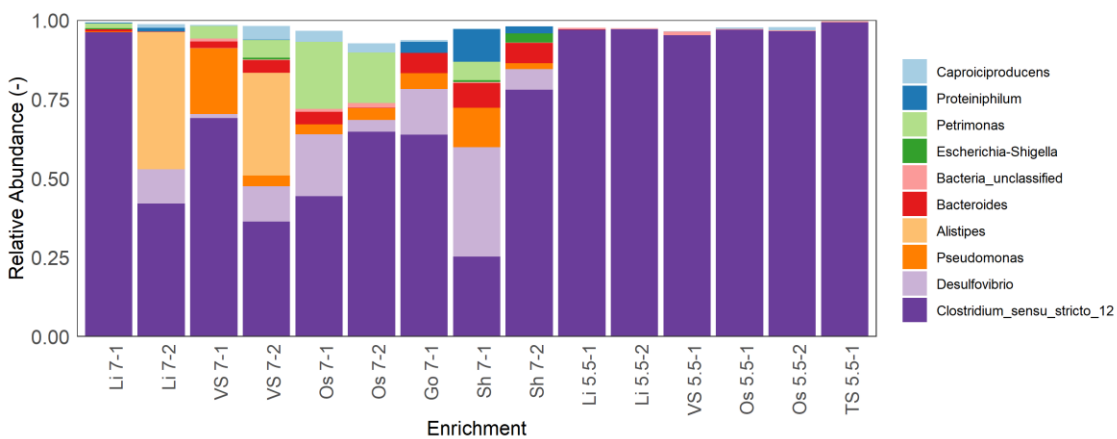

51

52 **Figure S.4.** Community composition determined by high throughput amplicon sequencing of  
 53 enrichment communities after 12 transfers for all communities. Sample names were constructed  
 54 of inoculum origin, enrichment pH and replicate number, e.g. Li 7 1 represents replicate 1 of  
 55 Lindemans inoculum enriched at pH 7.

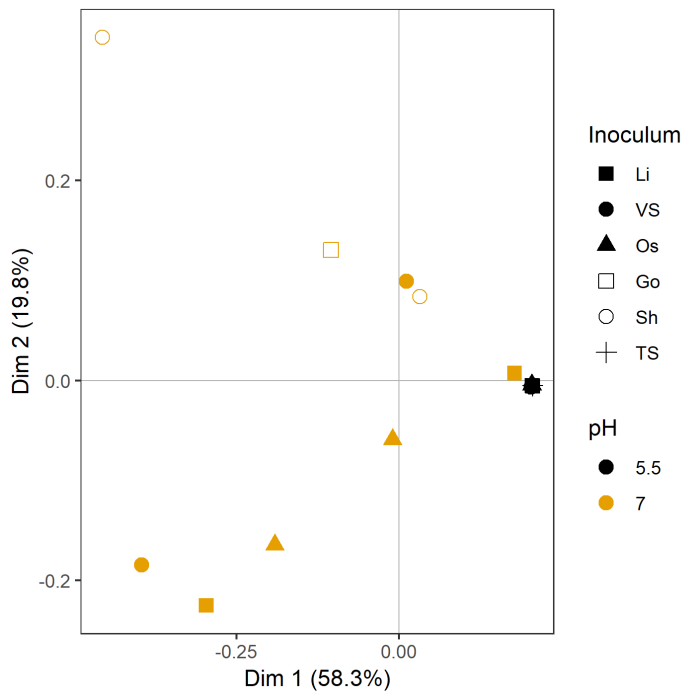

56

57 **Figure S.5.** Beta-diversity analysis of high-throughput amplicon sequencing data (Illumina) of  
 58 enriched communities after 12 transfers. pH and inoculum are indicated by color and shape of  
 59 the points respectively. Black symbols represent communities enriched at pH 5.5, gold points  
 60 those enriched at pH 7. Symbol shapes refer to the initial inoculum the community was  
 61 enriched from; full square for Lindemans brewery full-scale UASB (Li, ■), full circle for Van  
 62 Steenberghe brewery full-scale UASB (VS, ●) full triangle for Ossemeersen full-scale waste  
 63 activated sludge digester (Os, ▲), empty square for goat feces (Go, □), empty circle for sheep  
 64 feces (Sh, ○), and plus sign for + semi-pilot-scale thin stillage fermenter producing caproic  
 65 acid.

66 **S.4. Community composition of inocula**

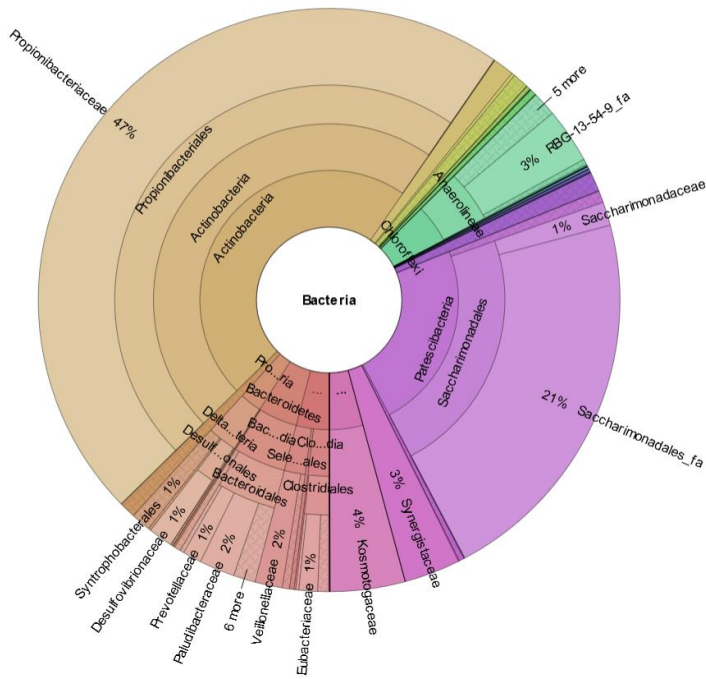

67

68 **Figure S.6.** Krona plot<sup>1</sup> of community present in the full-scale granular sludge digester at  
69 Lindemans brewery (Li)

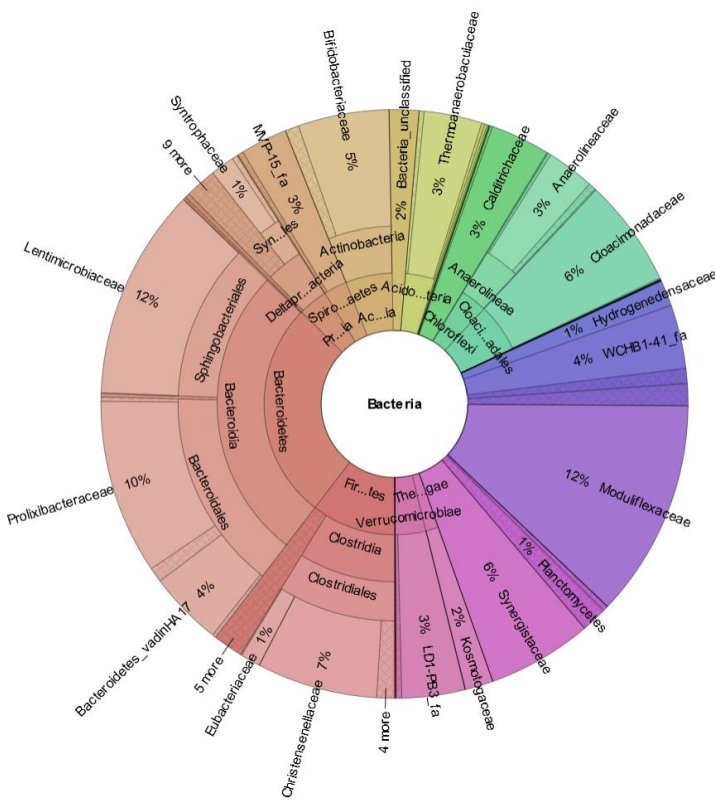

70

71 **Figure S.7.** Krona plot<sup>1</sup> of community present in the full-scale granular sludge digester at Van  
72 Steenberg brewery (VS)

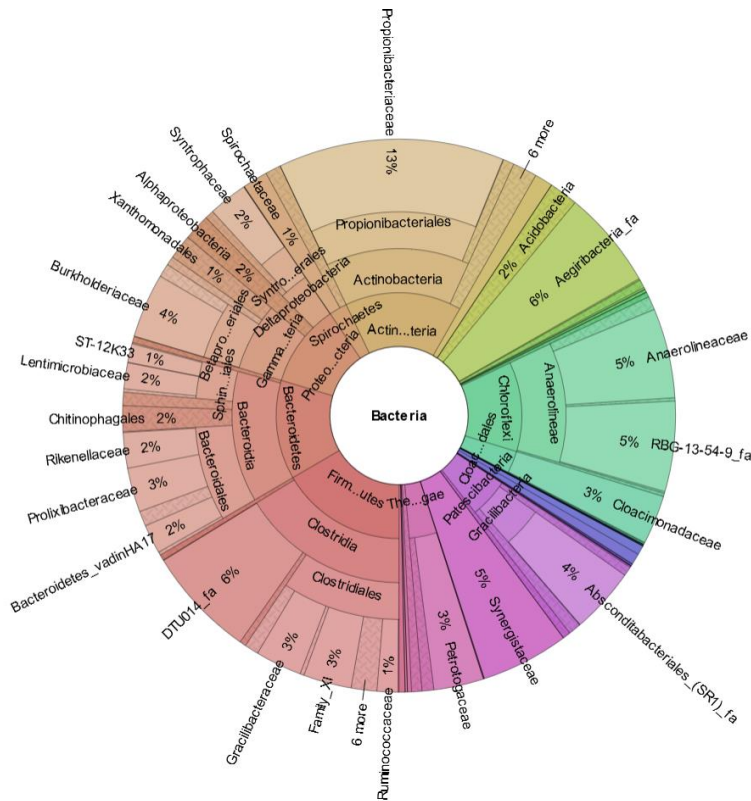

73

74 **Figure S.8.** Krona plot<sup>1</sup> of community present in the full-scale waste activated sludge digester  
 75 at the Ossemeersen wastewater treatment plant (Os)

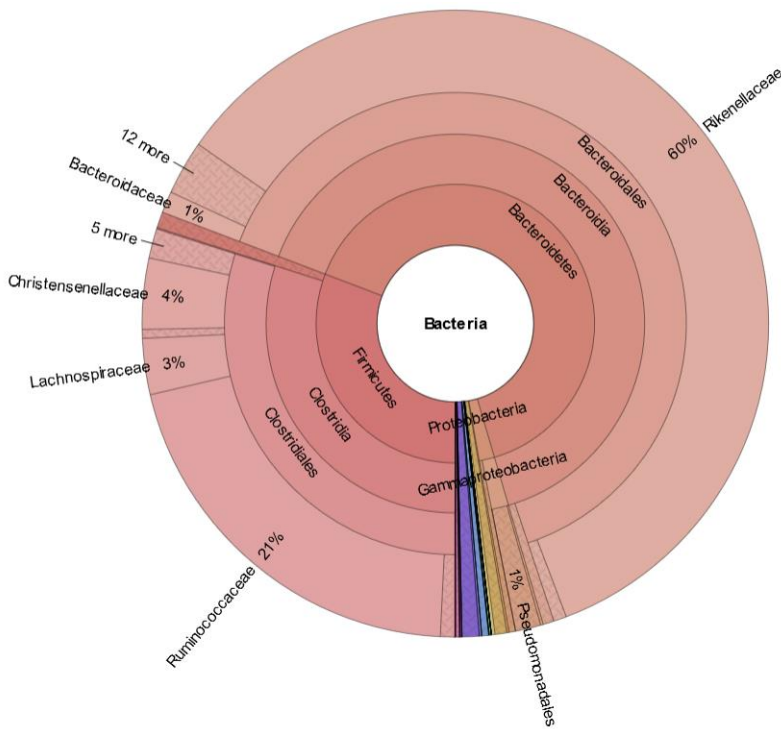

76

77 **Figure S.9.** Krona plot<sup>1</sup> of community present in goat faeces used for this enrichment study  
 78 (Go)

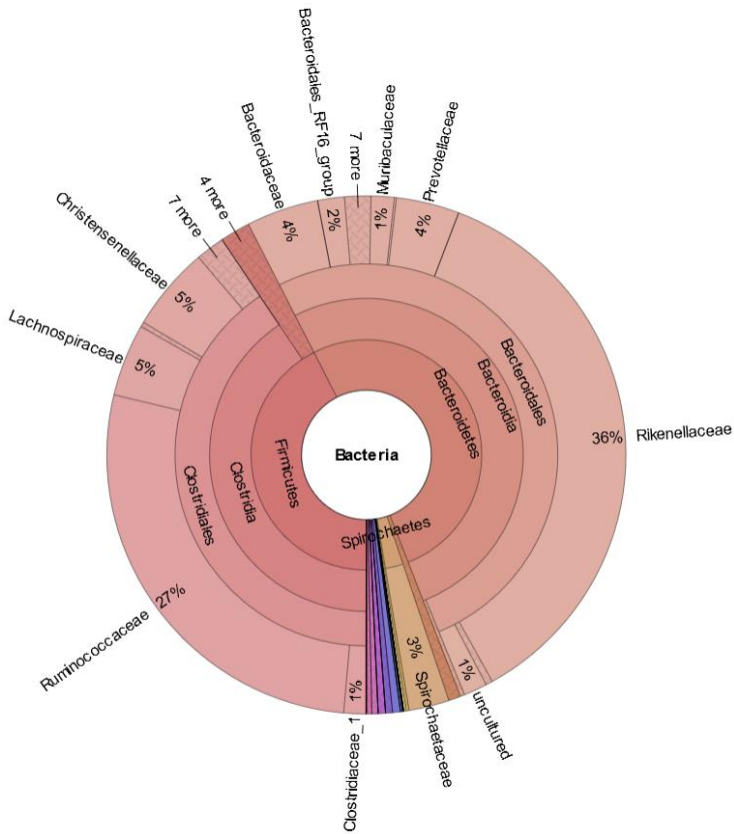

79

80 **Figure S.10.** Krona plot<sup>1</sup> of community present in sheep faeces used for this enrichment study  
 81 (Sh)

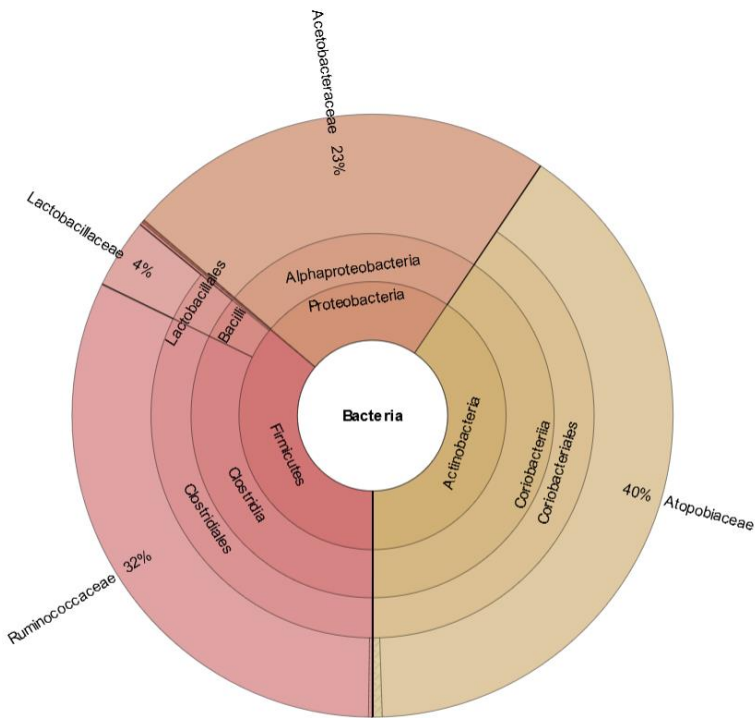

82

83 **Figure S.11.** Krona plot<sup>1</sup> of community present in a thin stillage fermenting lab-scale pilot  
 84 installation (TS)



85 **S.5. Growth curves for each enrichment series**

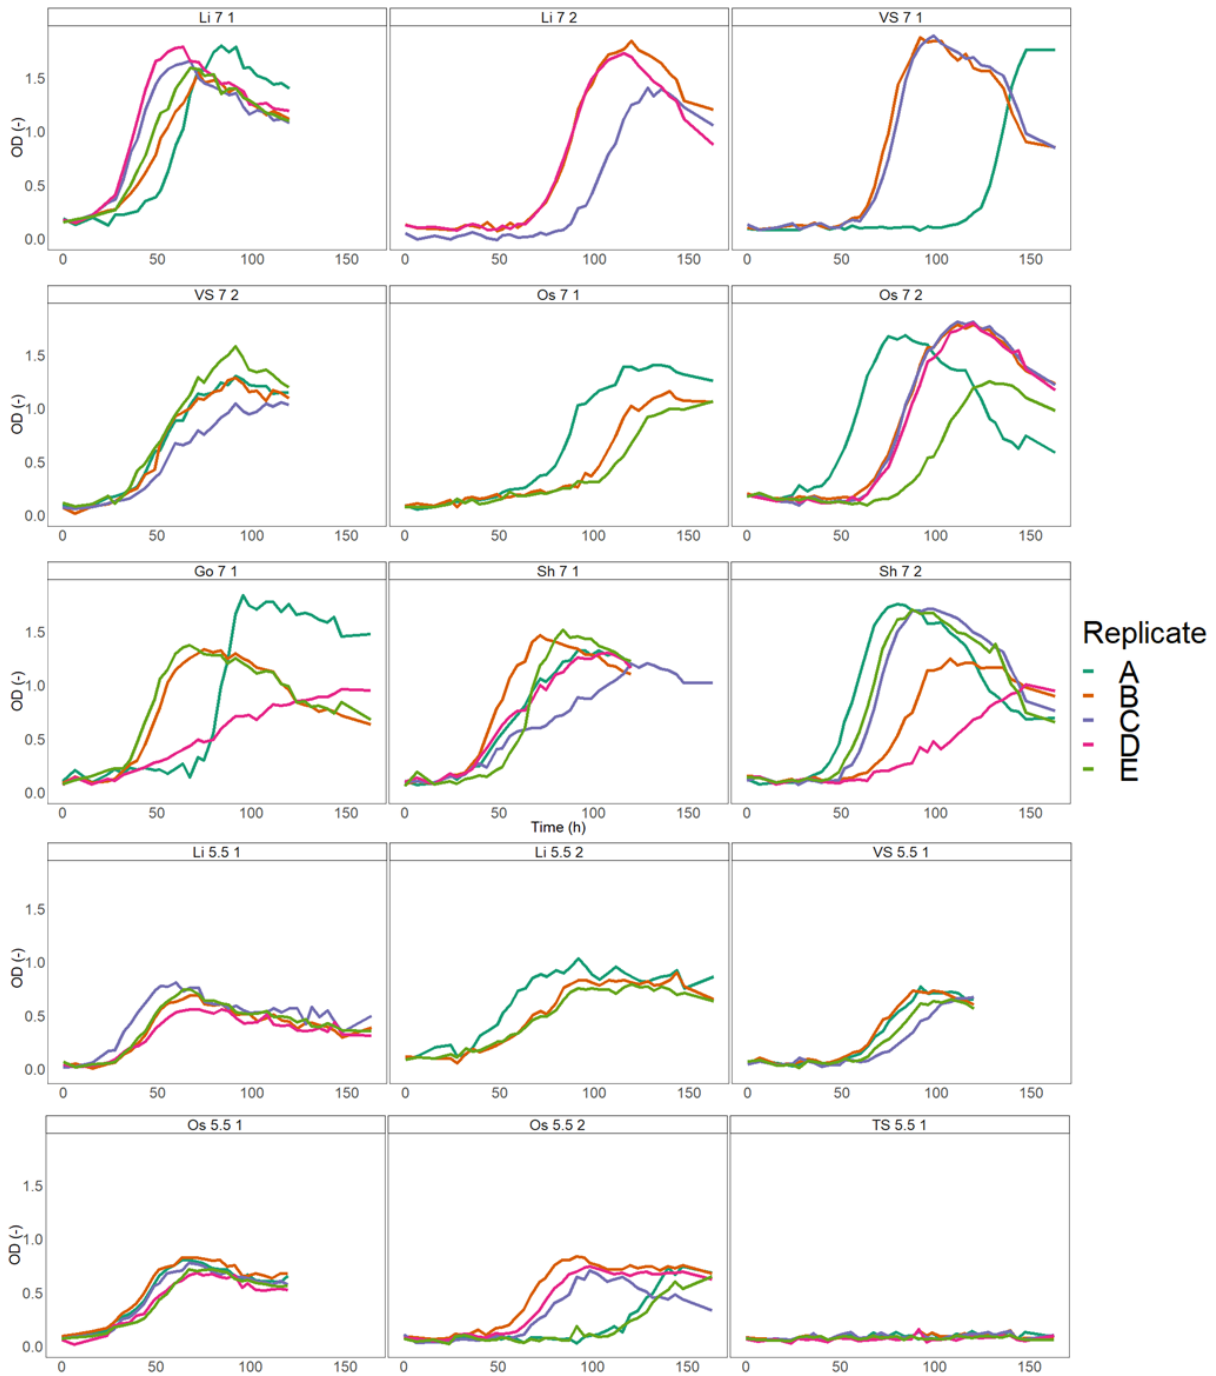

86

87 **Figure S.12.** Growth curves of each enrichment used for further growth rate calculations. In  
 88 experiments where growth was completed after 120h, measurements were stopped. Sample  
 89 names were constructed of inoculum origin, enrichment pH and replicate number, e.g. Li 7 1  
 90 represents replicate 1 of Lindemans inoculum enriched at pH 7.

91 **S.6. Impact of *Desulfovibrio* on product profile**

92 The impact of the presence of *Desulfovibrio* on the product spectrum was investigated by first  
93 looking at the average product profile in communities at pH 7 and pH 5.5 with or without  
94 *Desulfovibrio*. The cut-off for presence was arbitrarily put at 5%, to select communities that  
95 were highly enriched in *Desulfovibrio*. Looking at the average product profile, both at pH 5.5  
96 and 7 an increase can be seen in butyric acid when *Desulfovibrio* is present, although the spread  
97 at pH 7 is quite large (Figure S.13)

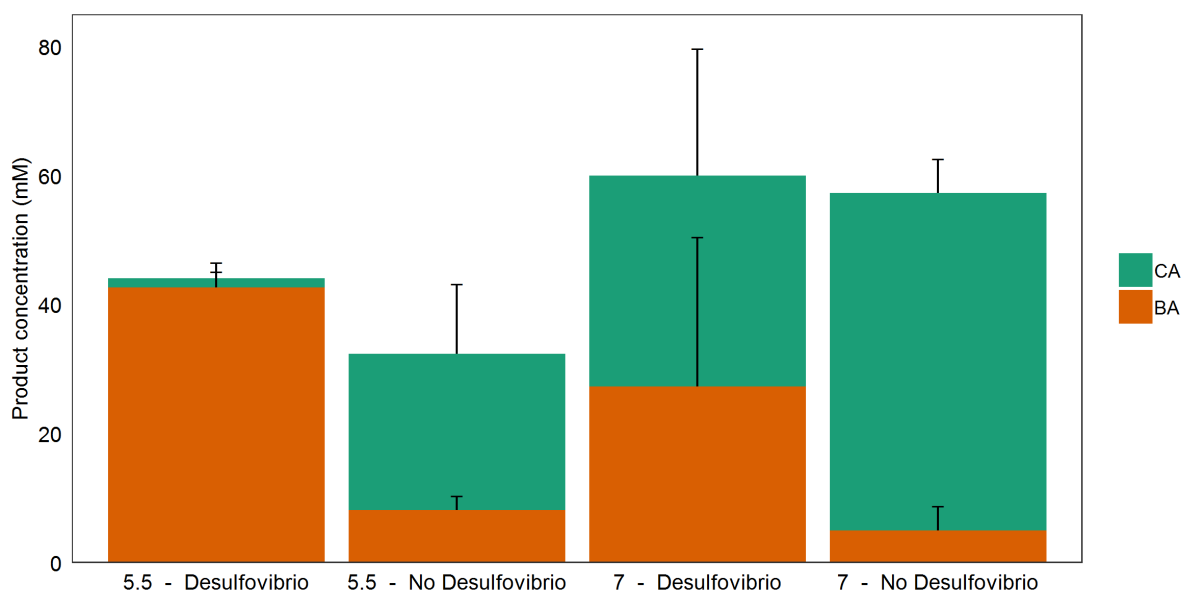

98

99 **Figure S.13.** Average concentrations of butyric acid (BA) and caproic acid (CA) at pH 7 and  
100 pH 5.5 after growth curves, comparing communities with *Desulfovibrio* (>5% relative  
101 abundance) to those with less than 5% *Desulfovibrio*.

102 To confirm these observations, an ANOVA test was performed, studying the impact of the  
103 presence of *Desulfovibrio* on butyric acid concentrations. Data at pH 5.5 were analysed  
104 separately from data at pH 7. While both pH showed a significant p-value for the impact of  
105 *Desulfovibrio*-presence (p=0.008 for pH 7; p<0.001 for pH 5.5), the Shapiro-Wilk normality  
106 test showed residuals at pH 7 were not normally distributed (p=0.001), making it impossible to  
107 make hard claims on this observation at pH 7. We can however conclude that at pH 5.5, the  
108 presence of *Desulfovibrio* significantly shifted the product profile towards butyric acid, as  
109 residuals were normally distributed (p=0.19).

## 110 S.7. Electron balance over growth curve experiment

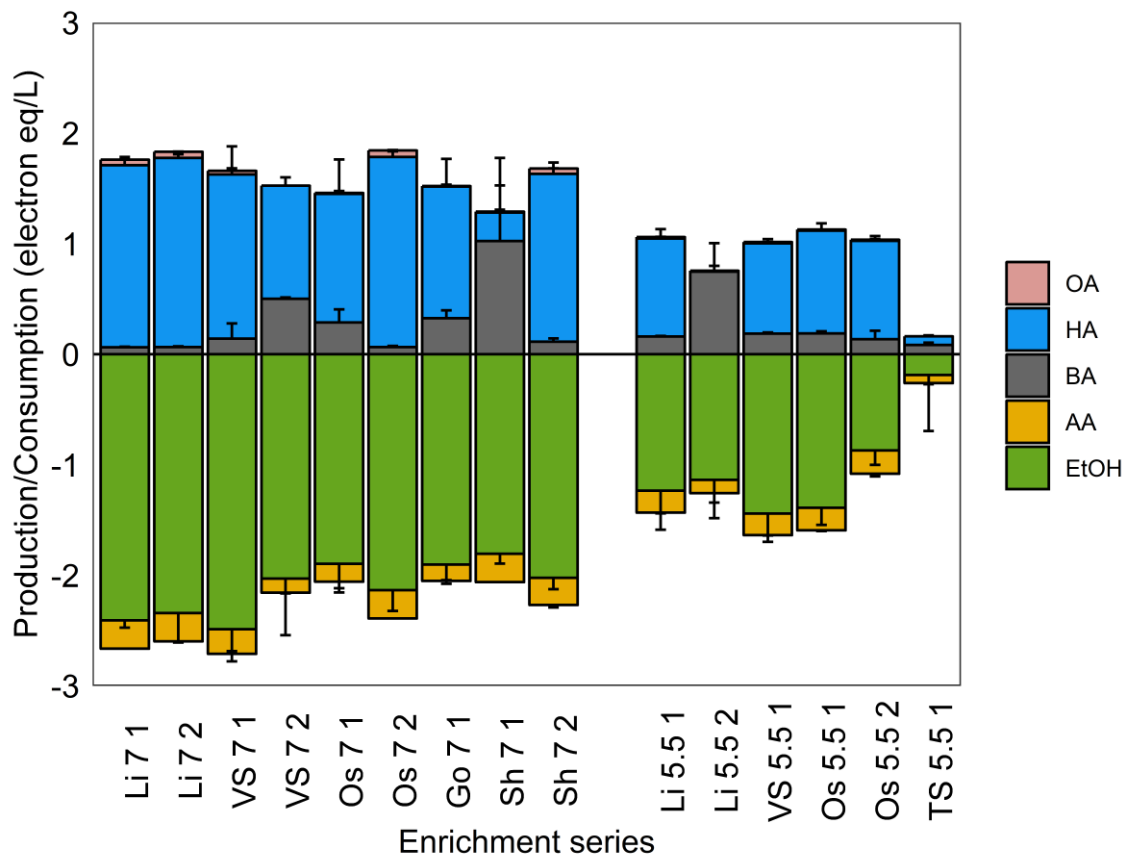

111

112 **Figure S.14.** Electron balance for each enrichment for the growth curve experiment. Error bars  
113 indicate standard deviation over all replicates (n=3-5). Sample names were constructed of  
114 inoculum origin, enrichment pH and replicate number, e.g. Li 7 1 represents replicate 1 of  
115 Lindemans inoculum enriched at pH 7.

## 116 S.8. Methods

### 117 S.8.1. Medium Composition

118 Medium for enrichments was modified from the DSM52 medium used for *C. kluyveri*, with a  
119 medium composition (in 1L basal medium): 0.31 g  $K_2HPO_4$ , 0.23 g  $KH_2PO_4$ , 0.25 g  $NH_4Cl$ ,  
120 0.05 g  $MgSO_4 \cdot 7H_2O$ , 0.06 g  $MgCl_2$ , 2.50 g  $NaHCO_3$ , 4.88 g 2-(N-morpholino)ethanesulfonic  
121 acid (MES), 5.28 g of 2-bromoethanesulfonate (BES), 4.28 g K-Ac and 15 mL ethanol  $\cdot L^{-1}$ .  
122 Vitamins and trace elements were added: 1 mL of trace element solution SL-10, 1 mL of  
123 selenite-tungstate solution and 0.1 mL of 7-vitamin solution. The SL-10 trace element solution  
124 consisted of (in 1L stock solution): 10 mL 7.7M HCl, 1.5 g  $FeCl_2 \cdot 4H_2O$ , 0.07 g  $ZnCl_2$ , 0.15 g  
125  $MnCl_2 \cdot 4H_2O$ , 0.006 g  $H_3BO_3$ , 0.19 g  $CoCl_2 \cdot 6H_2O$ , 0.002 g  $CuCl_2 \cdot 2H_2O$ , 0.024 g  $NiCl_2 \cdot 6H_2O$

126 and 0.036 g  $\text{Na}_2\text{MoO}_4 \cdot 4\text{H}_2\text{O}$ . The selenite-tungstate solution contained (in 1L stock solution):  
127 0.5 g NaOH, 0.003g  $\text{Na}_2\text{SeO}_3 \cdot 5\text{H}_2\text{O}$  and 0.004 g  $\text{Na}_2\text{WO}_4 \cdot 2\text{H}_2\text{O}$ . The 7-vitamin solution  
128 consisted of (in 100 mL stock solution): 0.1 g vitamin B12, 0.08 g p-aminobenzoic acid, 0.02  
129 g D(+)-Biotin, 0.2 g nicotinic acid, 0.1 g Ca-pantothenate, 0.3 g pyridoxine hydrochloride, 0.2  
130 g thiamine-HCl.  $2\text{H}_2\text{O}$ . Medium without ethanol was sparged for 15 min with  $\text{N}_2/\text{CO}_2$  (90:10),  
131 after which ethanol was added, and pH corrected to 7 using HCl or NaOH. Medium was  
132 distributed in 40 mL aliquots in 120 mL serum flasks. Medium was then corrected to pH 5.5  
133 using HCl and again distributed in 40 mL aliquots in 120 mL serum flasks. The headspace was  
134 then replaced by  $\text{N}_2$  using a gas exchange apparatus. For revival of the communities and  
135 subsequent growth curve tests, medium without ethanol,  $\text{NaHCO}_3$ , vitamins and trace elements  
136 was first distributed in Balch tubes, and autoclaved for 20 min at  $121^\circ\text{C}$ . Subsequently, the  
137 necessary additions were supplemented from sterile anaerobic stocks and pH corrected with  
138 sterile anaerobic 1M HCl or 1M NaOH. Final working volume was 9 mL per Balch tube ( $V_{\text{tot}}$   
139 = 26 mL), to maintain the same headspace-liquid ratio.

140 S.8.2. Enrichment strategy

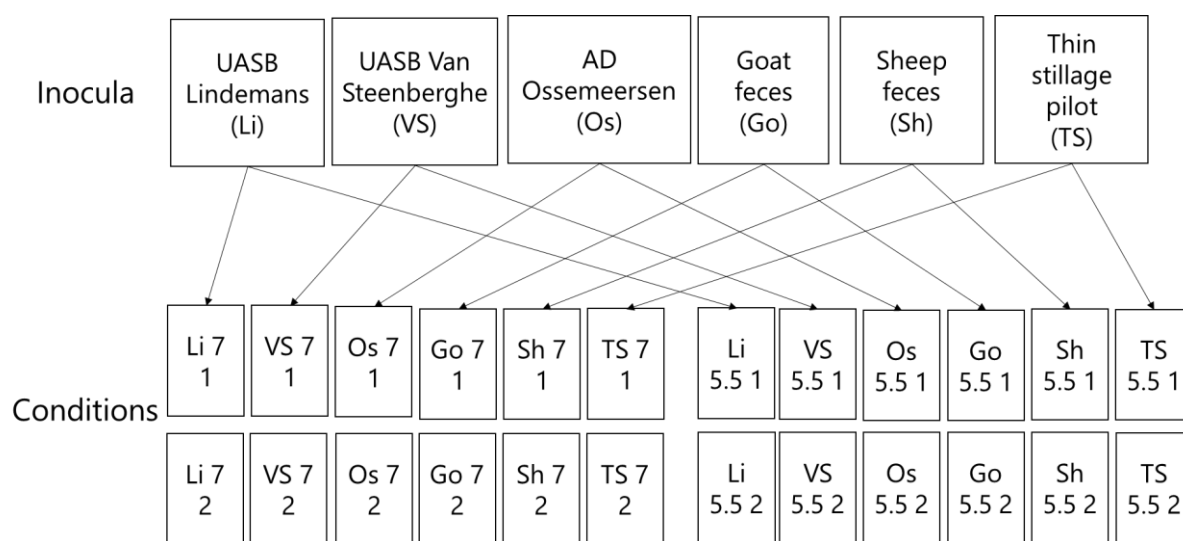

141

142 **Figure S.15.** Schematic overview of enrichment strategy from six inocula, at two pH in  
 143 duplicate

144 S.8.3. Chemical analyses

145 C2 to C8 carboxylic acids (including isoforms C4 to C6) were determined by gas  
 146 chromatography (GC; GC-2014, Shimadzu®, The Netherlands), with a DB-FFAP 123-3232  
 147 column (30 m × 0.32 mm × 0.25 µm; Agilent, Belgium) and a flame ionisation detector (FID).  
 148 Liquid samples were conditioned with 2 mL sulfuric acid, 200 mg sodium chloride, and 2-  
 149 methyl hexanoic acid as an internal standard for quantification before further extraction with  
 150 diethyl ether (1:1 volume sample:ether). The sample (1 µL) was injected at 250°C with a split  
 151 ratio of 50 and a purge flow of 3 mL·min<sup>-1</sup>. The oven temperature increased by 10°C·min<sup>-1</sup>  
 152 from 110 to 250°C where it was maintained for 5 min. The FID had a temperature of 300°C.  
 153 Nitrogen carrier gas was maintained at a flow rate of 2.49 mL·min<sup>-1</sup>. The GC was externally  
 154 calibrated with a minimum detection limit of 60 mg·L<sup>-1</sup> for acetic acid, and 10 mg·L<sup>-1</sup> for all  
 155 higher carboxylic acids.

156 Alcohols (acetone, methanol, ethanol, 1-propanol, 2-propanol, 1-butanol, 1-pentanol and  
 157 1-hexanol) were measured by GC (GC-2010-Plus, Shimadzu®, Belgium) with a Stabilwax-  
 158 DE-S column (30m x 0.32mm x 1.0 µm, Shimadzu®, Belgium) and an FID. 1 µL of sample

159 was injected at 230°C with a split ratio of 50 and purge flow of 3.0 mL·min<sup>-1</sup>. Oven temperature  
160 was put at 35°C for one minute, after which it increased from 35°C to 230°C at a rate of 10°C  
161 min<sup>-1</sup> where it was kept for 2 minutes. FID temperature was set at 250°C, carrier gas was  
162 nitrogen gas at a flow rate of 1.09 mL·min<sup>-1</sup>. The GC was externally calibrated with a minimum  
163 detection limit of 25 mg·L<sup>-1</sup>.

164 The gas-phase composition was analyzed with a Compact GC (Global Analyser Solutions,  
165 Breda, The Netherlands). CH<sub>4</sub>, O<sub>2</sub> and N<sub>2</sub> were analysed with a Molsieve 5A precolumn and  
166 Porabond column using He as a carrier gas, H<sub>2</sub> was analysed with the same precolumn and  
167 column, but using N<sub>2</sub> as a carrier gas. CO<sub>2</sub>, N<sub>2</sub>O, and H<sub>2</sub>S were analysed using an Rt-Q-bond  
168 precolumn and column with He as a carrier gas. A thermal conductivity detector was used to  
169 determine gases in the headspace.

## 170 S.9. Quality control of sequencing

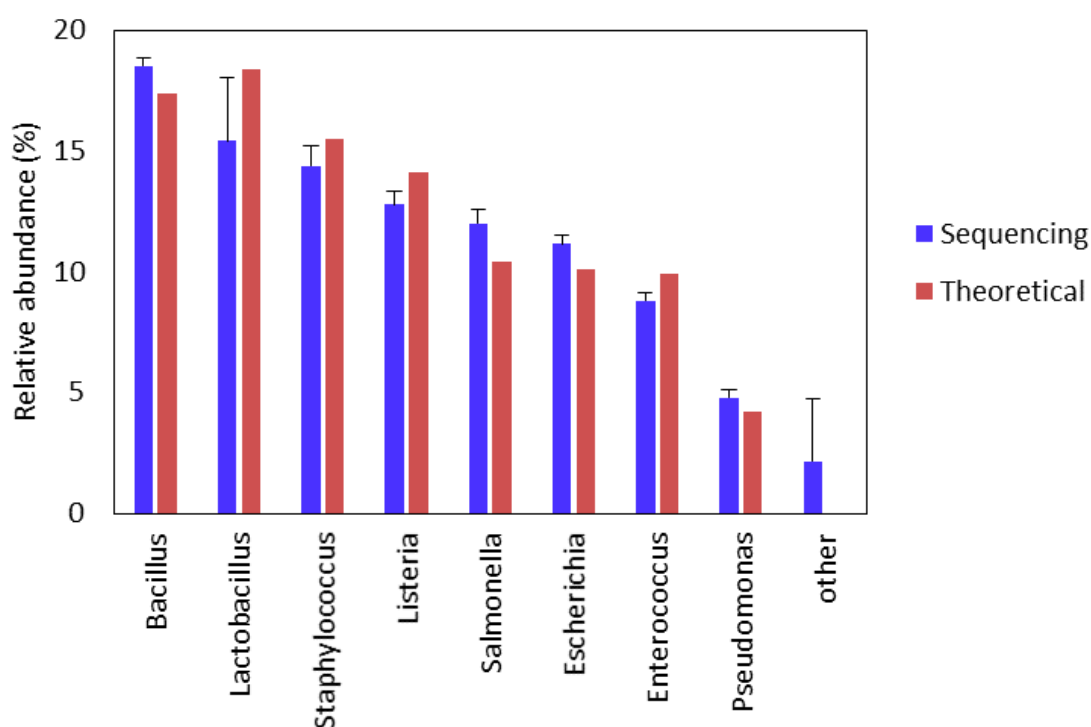

171

172 **Figure S.16.** Quality control of Illumina sequencing by comparison of a mock community with  
173 known composition to actual sequencing results, performed in triplicate

174 **8. References**

- 175 1. Ondov, B. D., Bergman, N. H. & Phillippy, A. M. Interactive metagenomic visualization  
176 in a Web browser. *BMC Bioinformatics* **12**, 1–9 (2011).
